# Supplementary material for: Wasted Children and Wasted Time: A Challenge to Meeting the Nutrition Sustainable Development Goals with a High Economic Impact to Ethiopia
Source: MDPI journal article supplement (doi:10.3390/nu12123698), 2020-11-30
Supplement: s1 [file s1]

Supplementary Material

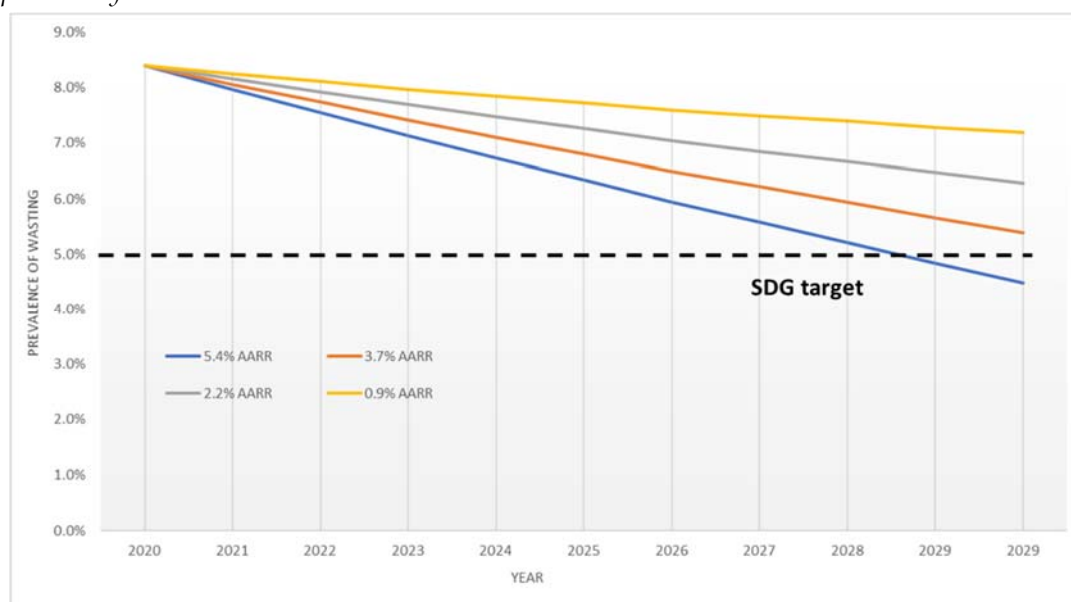

**Figure S1.** Trends of wasting prevalence from 2020 to 2030.

**Publisher's Note:** MDPI stays neutral with regard to jurisdictional claims in published maps and institutional affiliations.

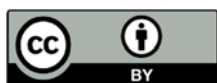

© 2020 by the authors. Submitted for possible open access publication under the terms and conditions of the Creative Commons Attribution (CC BY) license (<http://creativecommons.org/licenses/by/4.0/>).
